# Supplementary material for: Real-World Outcome of Treatment with Single-Agent Ibrutinib in Italian Patients with Chronic Lymphocytic Leukemia: Final Results of the EVIdeNCE Study
Source: MDPI journal article supplement (doi:10.3390/cancers16061228), 2024-03-20
Supplement: s1 [file s1]

# Real-World Outcome of Treatment with Single-Agent Ibrutinib in Italian Patients with Chronic Lymphocytic Leukemia: Final Results of the EVIDENCE Study

## Supplementary materials

**Figure S1.** Kaplan-Meier curves for the time to ibrutinib permanent discontinuation during the 24-month observational period by the line of treatment in which the drug was administered (Panel A) and by patients' age (Panel B) in the prospective real-world EVIDENCE study

**Panel A**

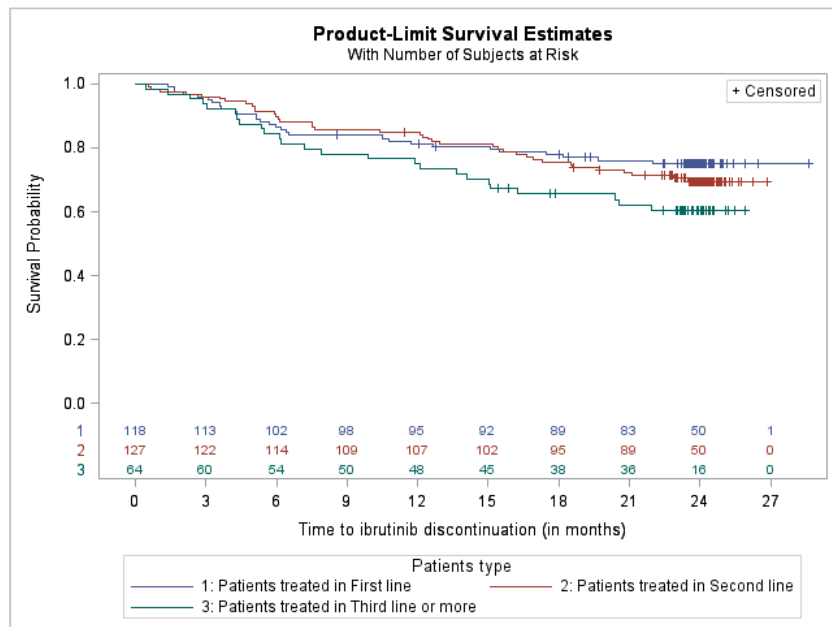

**Panel B**

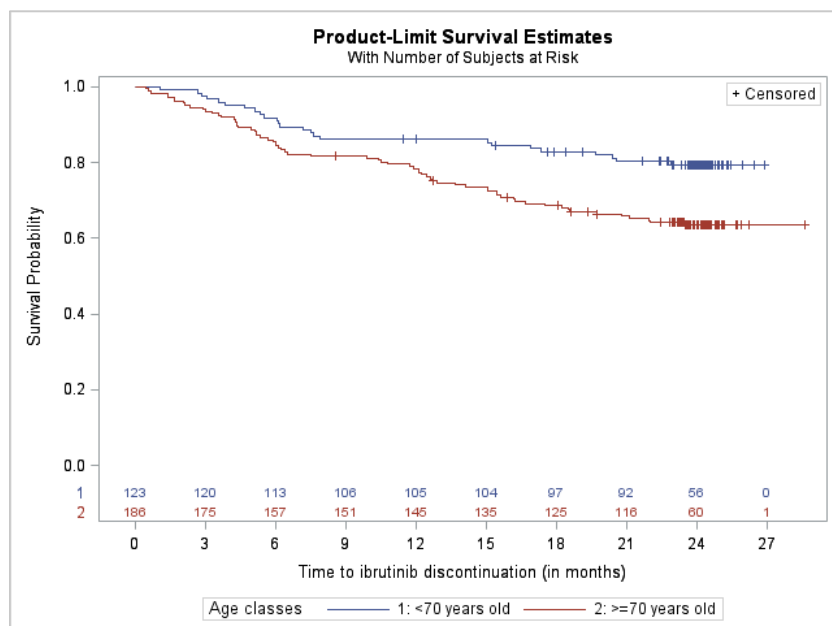

**Figure S2.** Kaplan-Meier progression free survival (Panel A) and overall survival (Panel B) curves by the line of treatment in which the drug was administered in the prospective real-world EVIDeNCE study

**Panel A**

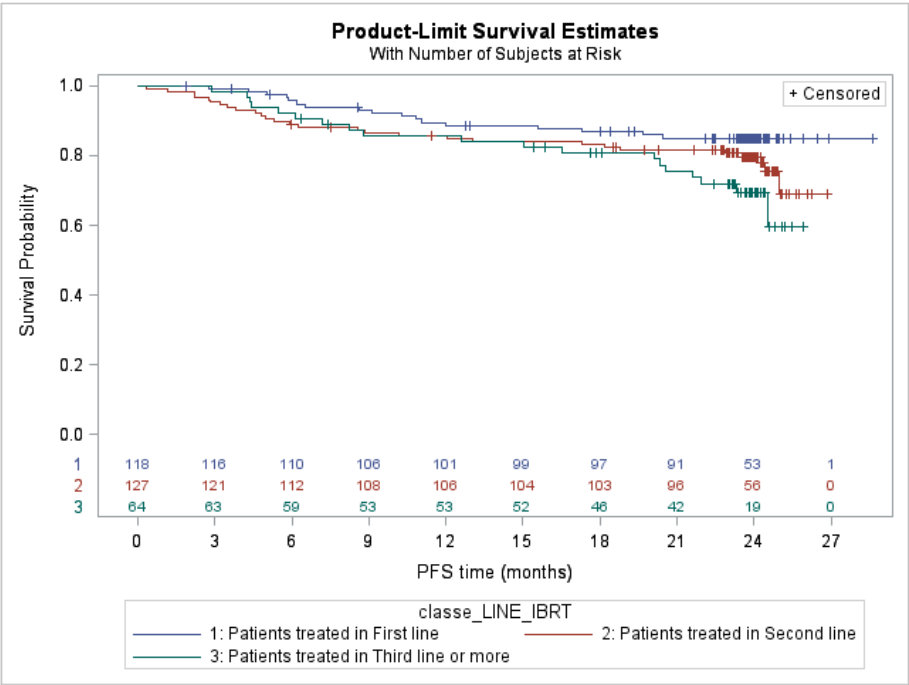

**Panel B**

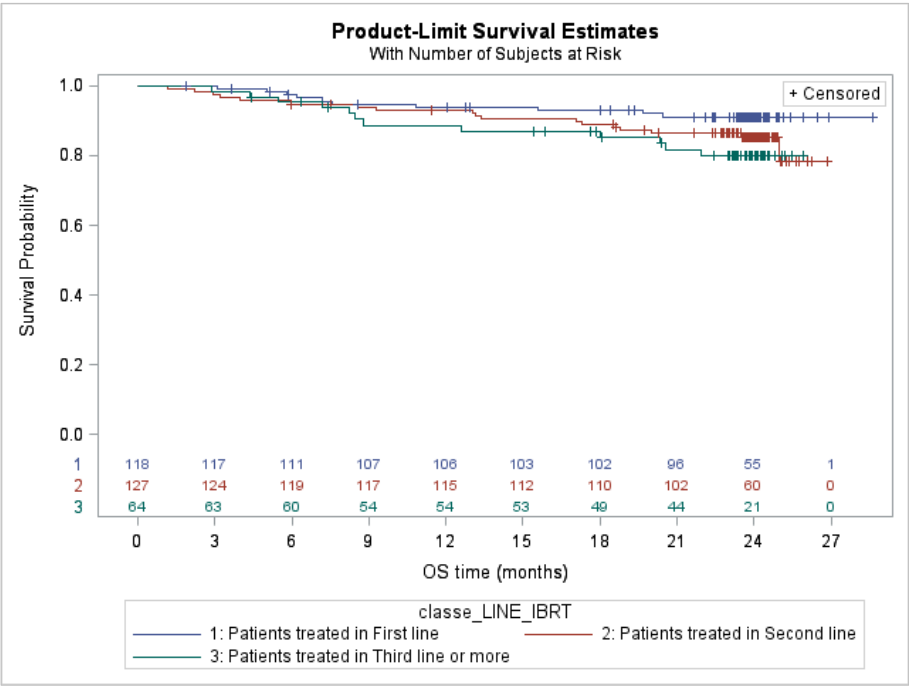

**Figure S3.** Cumulative incidence of cardiovascular adverse events (AEs), atrial fibrillation, and infections in treatment-naïve (Panel A) and relapsed/refractory (Panel B) patients with chronic lymphocytic leukemia treated with ibrutinib in the prospective real-world EVIDENCE study

**Panel A**

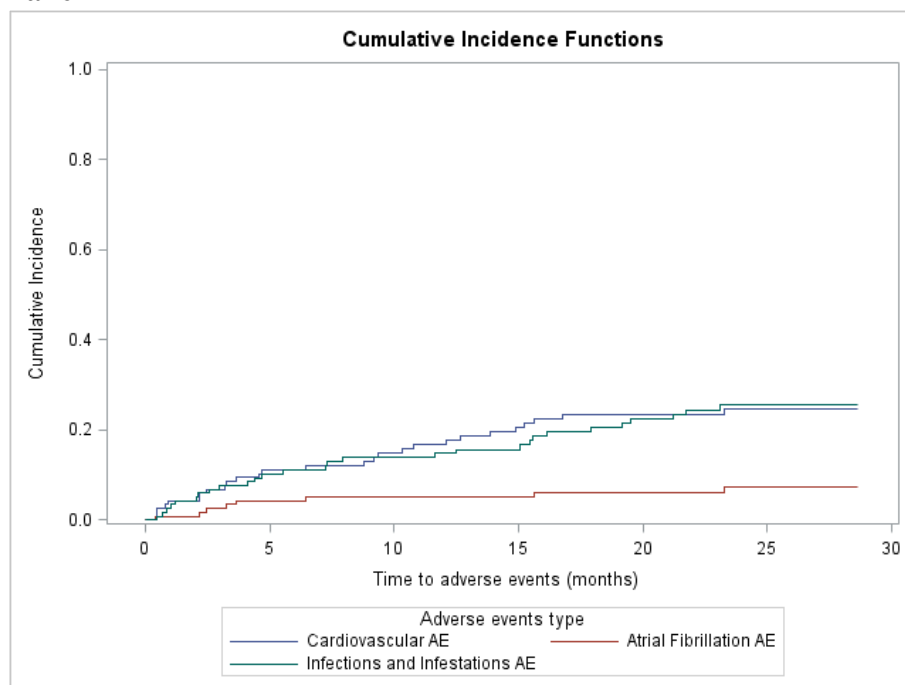

**Panel B**

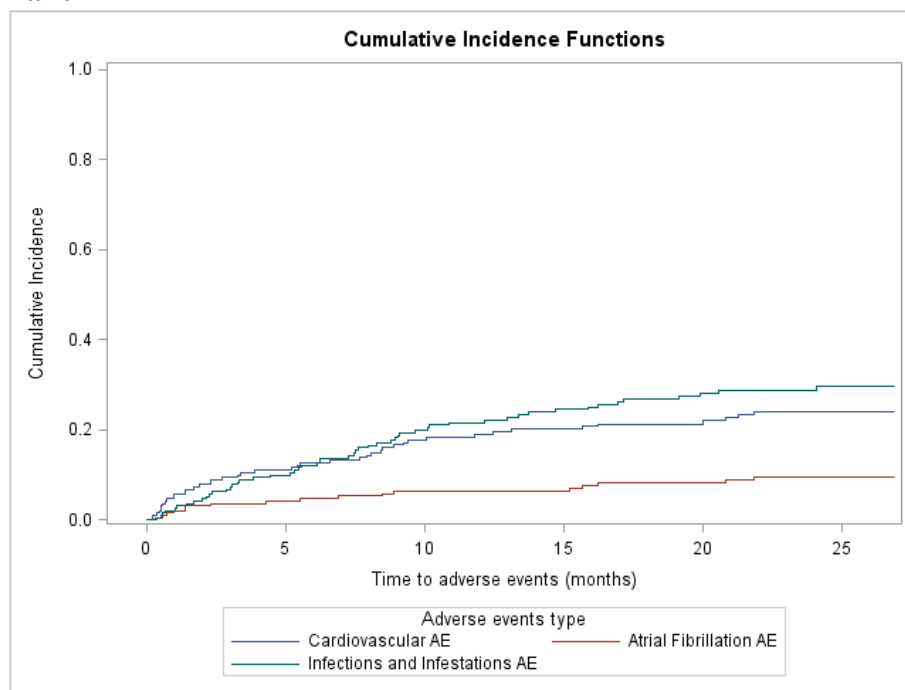

**Table S1.** Details on first dose of ibrutinib in patients with chronic lymphocytic leukemia in EVIdENCE Study.

|                                              | 1L (N=118)<br>n (%) | 2L (N=127)<br>n (%) | ≥3L (N=64)<br>n (%) | Overall<br>(N=309) |
|----------------------------------------------|---------------------|---------------------|---------------------|--------------------|
| Posology of first dose of ibrutinib          |                     |                     |                     |                    |
| 420 mg once daily (ibrutinib only)           | 85 (72.0)           | 101 (79.5)          | 45 (70.3)           | 231 (74.8)         |
| 140 mg once daily (ibrutinib only)           | 19 (16.1)           | 12 (9.4)            | 8 (12.5)            | 39 (12.6)          |
| 280 mg once daily (ibrutinib only)           | 14 (11.9)           | 13 (10.2)           | 11 (17.2)           | 38 (12.3)          |
| 280 mg once daily (ibrutinib in combination) | 0 (0.0)             | 1 (0.8)             | 0 (0.0)             | 1 (0.3)            |

**Table S2.** Details on ibrutinib dose modification during treatment in patients with chronic lymphocytic leukemia in EVIdENCE Study.

|                                                                                                          | 1L (N=118)<br>n (%) | 2L (N=127)<br>n (%) | ≥3L (N=64)<br>n (%) | Overall<br>(N=309) |
|----------------------------------------------------------------------------------------------------------|---------------------|---------------------|---------------------|--------------------|
| Patients receiving full dose (420 mg once daily) of ibrutinib during the observation period at any time  | 106 (89.8)          | 122 (96.1)          | 56 (87.5)           | 284 (91.9)         |
| Patients with ibrutinib first dose equal to 420 mg once daily with at least a dose decrease <sup>^</sup> | 20 (23.5)           | 24 (23.8)           | 15 (33.3)           | 59 (25.5)          |
| Patients with ibrutinib first dose less than 420 mg once daily increasing dose to 420 mg <sup>¶</sup>    | 21 (63.6)           | 21 (80.8)           | 11 (57.9)           | 53 (67.9)          |

<sup>^</sup> Percentages were calculated over the number of patients with starting dose equal to 420 mg once daily.

<sup>¶</sup> Percentages were calculated over the number of patients with starting dose less than 420 mg once daily.
